# Supplementary material
Source: PubMed Central journal article supplement (PMC5471111)

**Gene-based analysis of regulatory variants identifies four novel asthma risk genes related to  
nucleotide synthesis and signaling**

**Online repository**

Manuel A.R. Ferreira, PhD,<sup>a</sup> Rick Jansen, PhD,<sup>b</sup> Gonneke Willemsen, PhD,<sup>c</sup> Brenda Penninx, PhD,<sup>b</sup>  
Lisa M Bain, BSc,<sup>a</sup> Cristina T Vicente, BSc,<sup>a</sup> Joana A Revez, BSc,<sup>a</sup> Melanie C. Matheson, PhD,<sup>c</sup> Jennie  
Hui, PhD,<sup>f-i</sup> Joyce Y. Tung, PhD,<sup>j</sup> Svetlana Baltic, PhD,<sup>k</sup> Peter Le Souëf, FRACP,<sup>l</sup> AAGC  
collaborators<sup>m</sup>, Grant W. Montgomery, PhD,<sup>a</sup> Nicholas G. Martin, PhD,<sup>a</sup> Colin F. Robertson, FRACP,<sup>n</sup>  
Alan James, FRACP,<sup>i,o,p</sup> Philip J. Thompson, FRACP,<sup>k,o</sup> Dorret I. Boomsma, PhD,<sup>c</sup> John L. Hopper,  
PhD,<sup>c</sup> David A. Hinds, PhD,<sup>j</sup> Rhiannon B. Werder, BSc,<sup>q\*</sup> and Simon Phipps, PhD,<sup>q\*</sup>

## Supplementary Methods

### EUGENE approach

The proposed gene-based approach includes four steps, which for a given gene briefly consists of: (1) identifying variants that influence gene expression; (2) extracting association results for these regulatory variants from a disease or trait GWAS of interest and then calculate a gene-based statistic  $Q$  – this represents the aggregate evidence for association in that GWAS across all regulatory variants of that gene; and perform simulations using individual-level genetic data to estimate (3) the statistical significance of  $Q$  and (4) false discovery rate (FDR) thresholds to empirically account for multiple testing. These steps are described in more detail below; the software and input files required to run EUGENE are freely available at <https://genepi.qimr.edu.au/staff/manuelF>.

*Step 1: generate a list of independent single nucleotide polymorphisms (SNPs) that are associated with variation in gene expression levels (ie. expression quantitative trait loci, eQTLs).* First, a database of eQTLs associated with gene expression levels in *cis* (located < 1 Mb from gene boundaries) or *trans* (> 1 Mb away or in a different chromosome) was created from 16 published transcriptome GWAS that analysed 12 tissues or cell types relevant for asthma (**Table E2**). Other biologically relevant marks of gene regulation (eg. CpG methylation) will be made available as studies with greater power to identify such effects are published. Second, for each gene, the eQTLs in this database were reduced to a sub-set with linkage disequilibrium (LD)  $r^2 < 0.1$ , using the clump procedure implemented in PLINK <sup>1</sup>. We refer to these as “independent eQTLs” for a given gene; more stringent LD thresholds (eg. low |D'|) or conditional association analyses could be used to generate a more conservative set of independent eQTLs. The average number of independent eQTLs per gene was 5.1 (median=3, maximum=97, IQR=5; **Figure E1**). Third, we used data from the 1000 Genomes project <sup>2</sup> to identify all known proxies ( $r^2 > 0.8$ ) for each independent eQTL. This is important because if a specific eQTL is not tested in a given GWAS, a proxy SNP might still be available and could instead be

used for analysis. A file containing independent eQTLs for each gene, and their respective proxy SNPs, is required to run EUGENE and is available at <https://genepi.qimr.edu.au/staff/manuelF>. Files containing eQTLs in tissues relevant for other diseases or traits are also available but were not analysed in this study.

*Step 2: calculate a gene-based association statistic  $Q$  for each gene based on results from individual SNPs in a GWAS of interest.* The 1-df disease association chi-square statistic  $q$  for each of  $k$  independent eQTLs of gene  $i$  is extracted from the trait or disease GWAS of interest. If a specific eQTL was not tested, the most correlated proxy SNP available (with  $r^2 > 0.8$ ) is used. Then, for each gene  $i$ , the overall statistical evidence for association between all  $k$  independent eQTLs tested for that gene and the trait or disease of interest is simply calculated as  $Q_i = \sum_{j=1}^k q_{ij}$ , that is, the sum of the individual chi-square statistics across all independent eQTLs tested.

*Step 3: perform simulations using individual-level genetic data to estimate the statistical significance of  $Q_i$ .* When eQTLs of the same gene are in linkage equilibrium (eg.  $r^2 \sim 0$ ), a measure of statistical significance of  $Q_i$  could be obtained from a chi-square distribution with  $k$  degrees of freedom. In this scenario, this asymptotic  $P$ -value is not inflated under the null hypothesis of no association (not shown). However, as the LD between eQTLs increases, the asymptotic  $P$ -value becomes inflated under the null: for example, using an  $r^2$  threshold of 0.1 to define independent eQTLs, on average (across 1,000 simulated GWAS) 5.4% of genes had a significant asymptotic  $P$ -value at  $P < 0.05$ , a 1.08-fold increase over the 5.0% nominal expectation. This is because the assumption of statistical independence between eQTLs of a gene is not strictly achieved with that  $r^2$  threshold. For this reason, we do not calculate an asymptotic  $P$ -value for  $Q_i$ , but instead estimate an empirical  $P$ -value that accounts for the residual LD between eQTLs. To estimate the empirical  $P$ -value for  $Q_i$ , we analyze the association between gene  $i$  and a dummy trait with a normal distribution in 379 unrelated individuals of European descent with genotype data available through the 1000 Genomes Project <sup>2</sup>.

Other GWAS datasets with available individual level genetic data can be used in this step, including those of non-European ancestry. Using a GWAS dataset with a larger sample size (>4,000 individuals) did not influence the performance of this step (not shown), and so we used data from the 1000 Genomes Project given its availability to other researchers and decreased computation time. Briefly, in this analysis we (1) simulate a normally-distributed phenotype for the genotyped individuals under the null hypothesis of no association with any eQTLs of gene  $i$ ; (2) test this phenotype for association with each eQTL – any significant associations in this analysis are due to chance only; and (3) calculate a gene-based association statistic  $Q$  as described above ( $Q_{i\_null}$ ). This procedure is repeated a large number of times (eg. 1 million simulations). The empirical  $P$ -value for  $Q_i$  is then calculated as the proportion of simulations for which  $Q_{i\_null} \geq Q_i$ .

*Step 4: perform simulations using individual-level genetic data to estimate FDR thresholds to account for multiple testing.* Typically, EUGENE will be used to test the association between a trait and many genes, and so it is important to address the impact of multiple testing on false positive findings. To achieve this, we adopt the false-discovery rate (FDR) quantity advocated by Storey and Tibshirani<sup>3</sup>. For a given threshold  $t$  (eg. 0.05), FDR is approximated by the expected number of genes with a  $P$ -value  $\leq t$  when the null is true ( $E[F_t]$ ), divided by the expected total number of genes with a  $P$ -value  $\leq t$  ( $E[S_t]$ ). A simple estimate of  $E[S_t]$  is the observed  $S_t$ , that is, the number of genes with a  $P$ -value  $\leq t$ . To estimate  $E[F_t]$ , we use simulations generated under the null using individual-level genetic data as described above. Specifically, we (1) simulate a normally-distributed phenotype for the genotyped individuals under the null hypothesis of no association with any eQTLs of all genes tested; (2) test this phenotype for association with all eQTLs analysed across all genes; and (3) calculate a gene-based association statistic  $Q$  and its empirical  $P$ -value for each gene tested as described above. This procedure is repeated 100 times. For each of these 100 simulations, we count the number of genes significant at different  $P$ -value thresholds  $t$  ( $10^{-6}$  down to 0.1); for a given  $t$ , the average count across 100 simulations

is taken as an estimate of  $E[F_t]$ . For each  $P$ -value threshold  $t$  considered, we estimate  $FDR_t$  as  $E[F_t] / E[S_t]$ ; based on these  $FDR_t$ , we determine the minimum  $P$ -value threshold  $t$  that would result in an FDR of 0.05. At this  $P$ -value threshold  $t$ , 5% of genes called significant are estimated to be false-positives. As a concrete example, in the discovery GWAS described in the main text, the  $P$ -value threshold that resulted in an FDR of 0.05 was  $1.9 \times 10^{-4}$ . At this threshold, 48 genes were associated with asthma risk, of which about 3 ( $48 \times 0.05$ ) are expected to be false-positives due to multiple testing.

### **Assessment of the type-1 error rate of EUGENE**

To assess whether the proposed gene-based test had an appropriate type-I error rate, we (1) simulated a dummy normally-distributed phenotype for 379 genotyped individuals, as described above, and tested its association with all available SNPs – that is, we simulated results from a GWAS under the null hypothesis of no association; (2) applied EUGENE to the resulting summary statistics and retained the gene-based  $P$ -value for each of 17,190 genes; and (3) repeated steps (1) and (2) to simulate and analyse results for 1,000 GWAS generated under the null. The type-I error rate for a given nominal  $\alpha$  was taken as the mean (across the 1,000 null GWAS) proportion of genes with a significant association at that  $\alpha$  level.

### **Functional studies in the mouse**

*Experiment set 1: Expression of P2ry13 and P2ry14 in a mouse model of acute experimental asthma.*

We used an established mouse model of acute allergic asthma<sup>4</sup> to identify the cell types that express P2ry13 and P2ry14 in the context of allergen-induced airway inflammation. Experiments were performed in accordance with the Animal Care and Ethics Committees of the University of Queensland (Brisbane, Australia). Briefly, two groups of eight- to twelve-week old wild-type C57Bl/6 mice were lightly anesthetized with isoflurane and sensitized intranasally with either saline solution (group 1) or

100 µg of HDM extract (*Dermatophagoides pteronyssinus*; Greer Laboratories, Lenoir, NC, USA; group 2) on day 0. Subsequently, mice were challenged with either saline (group 1) or 5 µg of HDM (group 2) at day 14, 15, 16 and 17 and sacrificed 3 hours later. In this model, mice challenged with HDM develop all the hallmark features of asthma, including airway hyperresponsiveness, mucous cell hyperplasia and granulocytic airway inflammation<sup>4</sup>.

To measure overall gene expression in lung, total RNA was isolated from the left lung with TriReagent solution (Ambion) and phenol-chloroform extraction. DNase digestion was performed with Turbo DNase (Ambion), according to the manufacturer's instructions. Reverse transcription was performed using M-MLV reverse transcriptase and random primers (Invitrogen). Quantitative real-time PCR was performed with SYBR Green (Life Technologies) and the primers described in **Table E13**. Expression values were normalized to *Hprt* and expressed as fold change over saline mice.

To identify individual cell types in the lung expressing P2ry13 and P2ry14, a bronchoalveolar lavage was performed by flushing the lungs with 600 µl of ice-cold PBS. The recovered fluid was centrifuged (1600 rpm for 5 minutes) and the bronchoalveolar lavage fluid (BALF) stored at -80°C until analysis. Lung lobes were dissected and single cell suspensions prepared by mechanical digestion through a cell strainer as described<sup>4</sup>. Following red blood cell lysis with Gey's lysis buffer, cells were counted then incubated with Fc block for 30 minutes at 4°C. Cells were then stained with anti-P2ry13 (Acris Antibodies) or anti-P2ry14 (Acris Antibodies), followed by appropriate fluorescently-labelled secondary. Then cells were stained with the following fluorescently labeled antibodies: FITC conjugated Ly6G (clone 1A8), PerCP-Cy5.5 conjugated CD11b (clone M1/70), AF647 conjugated Siglec F (clone E50-2440) (all BD Biosciences), BV570 conjugated Ly6C (clone HK1.4), BV785 conjugated CD11c (clone N418), AF488 conjugated Epcam (CD326) (clone G8.8), BV421 conjugated CD45 (clone 30-F11) (all Biolegend), PE conjugated B220 (clone RA3-6B2) and CD3ε (clone 145-2C11), APC-eFluor 780 or PE conjugated MHCII (clone M5/114.15.2) (all eBioscience). Cells were

enumerated using a BD LSR Fortessa cytometer (BD Biosciences, San Jose, CA, USA) and the data analyzed with FACSDiva v8 (BD Biosciences) and FlowJo v8.8 (Treestar).

To assess expression in airway epithelial cells, paraffin-embedded lung sections were prepared as previously described <sup>5</sup>. Lung sections were pretreated with 10% normal goat serum for 30 min. Sections were probed with anti-P2ry13 (Acris Antibodies) or anti-P2ry14 (Acris Antibodies) overnight at 4°C. Following incubation with appropriate secondary antibodies, immunoreactivity was developed with Fast Red (Sigma-Aldrich) and counterstained with Mayer's hematoxylin. Photomicrographs were taken at 400x and 1000x magnification using an Olympus BX-51 microscope with an Olympus DP-72 camera at room temperature and acquired using Olympus Image Analysis Software.

*Experiment set 2: Effect of in vivo exposure to P2ry13 and P2ry14 agonists on airway inflammatory profile in mice.* Given the high expression of both receptors on airway epithelial cells in naïve mice, we hypothesized that receptor activation could influence the release of alarmins, such as IL-33, and contribute to airway inflammation. To test this possibility, 6 naïve mice per group were inoculated via intra nasal (i.n.) route with saline, 10 nM 2-methyl-ADP (P2ry13 agonist; R&D), 10 nM UDP-glucose (P2ry14 agonist; Abcam) or 10 nM ATP (agonist for all P2ry receptors, except P2ry6 and P2ry14; Sigma), all in 50 uL (ie. total dose of 0.5 pmol for all nucleotides). For comparison, three additional groups of mice were inoculated with 100 ug of HDM (source as above), 100 ug of cockroach extract (*Blattella germanica*, Greer Laboratories) or 25 ug of alternaria alternata extract (*Alternaria tenuis*, Greer Laboratories). Two hours post-challenge, BALF was collected as described above and IL-33 levels measured by ELISA (R&D Systems). Seventy-two hours post-challenge, BALF was again collected to obtain immune cell counts and stained for flow cytometry as described above.

## E Tables

**Table E1.** Type-I error rate of EUGENE.

| <b>Nominal<br/>type-I error<br/>rate (<math>\alpha</math>)</b> | <b>Observed<br/>type-I error<br/>rate</b> |
|----------------------------------------------------------------|-------------------------------------------|
| 0.1000                                                         | 0.09818                                   |
| 0.0500                                                         | 0.04873                                   |
| 0.0100                                                         | 0.00950                                   |
| 0.0050                                                         | 0.00468                                   |
| 0.0010                                                         | 0.00090                                   |
| 0.0005                                                         | 0.00043                                   |

The observed type-I error rate corresponds to the average proportion of genes (out of 17,190 tested) with an association P-value  $\leq \alpha$ , when analyzing 1,000 GWAS simulated under the null hypothesis of no association.



**Table E2.** Number of genes with significant *cis* (+/- 1 Mb) eQTLs in published GWAS of gene expression that analyzed tissues relevant to asthma.

| N Genes | Reference | Tissue                   | Experiment/eQTL type |
|---------|-----------|--------------------------|----------------------|
| 11047   | 6         | Whole-blood              |                      |
| 10142   | 7         | Whole-blood <sup>a</sup> |                      |
| 9271    | 8         | Lung                     |                      |
| 8752    | 9         | Fibroblasts              |                      |
| 7461    | 10        | Monocytes                |                      |
| 7294    | 11        | LCLs                     |                      |
| 7225    | 9         | Lung                     |                      |
| 6823    | 10        | B-cells                  |                      |
| 6783    | 9         | Whole-blood              |                      |
| 5184    | 12        | PBMCs                    |                      |
| 3175    | 13        | Neutrophils              |                      |
| 2954    | 9         | LCLs                     |                      |
| 2754    | 9         | Spleen                   |                      |
| 2098    | 14        | Fibroblasts              |                      |
| 2097    | 14        | LCLs                     |                      |
| 1992    | 14        | T-cells                  |                      |
| 1732    | 15        | LCLs                     |                      |
| 1133    | 16        | LCLs                     |                      |
| 1074    | 17        | Monocytes                | Baseline             |
| 992     | 15        | Skin                     |                      |
| 916     | 17        | Monocytes                | LPS                  |
| 889     | 6         | Whole-blood              | Splice eQTLs         |
| 831     | 18        | Neutrophils              |                      |
| 528     | 6         | Whole-blood              | ASE eQTLs            |
| 508     | 19        | Skin                     | Normal               |
| 484     | 20        | Small airways            |                      |
| 404     | 19        | Skin                     | Uninvolved           |
| 381     | 19        | Skin                     | Lesional             |
| 313     | 21        | LCLs                     |                      |
| 81      | 17        | Monocytes                | Differential         |

<sup>a</sup> Including all *cis* SNP-gene associations significant at FDR of 0.5 (listed in file 2012-12-21-CisAssociationsProbeLevelFDR0.5.txt released with the original publication). LCLs: lymphoblastoid cell lines. PBMCs: peripheral blood mononuclear cells.

**Table E3.** Thirty one genes associated with asthma at an empirical FDR of 0.05 and located within 1 Mb (or on the MHC region) of established risk variants for allergic disease.

| Gene             | N eQTLs | <i>cis</i> -eQTLs |               |                      |         | <i>trans</i> -eQTLs |               |                      |         | EUGENE P-value |
|------------------|---------|-------------------|---------------|----------------------|---------|---------------------|---------------|----------------------|---------|----------------|
|                  |         | N Tested          | N with P<0.05 | Best individual eQTL |         | N Tested            | N with P<0.05 | Best individual eQTL |         |                |
|                  |         |                   |               | SNP                  | P-value |                     |               | SNP                  | P-value |                |
| Chromosome 2q12  |         |                   |               |                      |         |                     |               |                      |         |                |
| <i>IL1RL2</i>    | 2       | 2                 | 1             | rs9646944            | 6.7E-07 | 0                   | 0             | NA                   | NA      | 4.0E-6         |
| <i>IL18R1</i>    | 11      | 11                | 5             | rs6751967            | 3.2E-06 | 0                   | 0             | NA                   | NA      | 7.0E-6         |
| <i>IL18RAP</i>   | 18      | 16                | 6             | rs13018263           | 5.0E-06 | 0                   | 0             | NA                   | NA      | <1E-6          |
| Chromosome 4p14  |         |                   |               |                      |         |                     |               |                      |         |                |
| <i>TLR1</i>      | 9       | 6                 | 3             | rs12233670           | 1.4E-11 | 0                   | 0             | NA                   | NA      | <1E-6          |
| Chromosome 5q22  |         |                   |               |                      |         |                     |               |                      |         |                |
| <i>TSLP</i>      | 6       | 6                 | 4             | rs17132582           | 3.2E-04 | 0                   | 0             | NA                   | NA      | 7.0E-6         |
| Chromosome 6p21  |         |                   |               |                      |         |                     |               |                      |         |                |
| <i>HCP5</i>      | 23      | 20                | 4             | rs2071595            | 6.7E-06 | 2                   | 0             | rs891140             | 0.5289  | 9.1E-5         |
| <i>MICB</i>      | 41      | 28                | 8             | rs9268764            | 3.3E-05 | 2                   | 1             | rs647316             | 0.0249  | 1.1E-4         |
| <i>LTA</i>       | 16      | 13                | 5             | rs2442752            | 1.5E-05 | 0                   | 0             | NA                   | NA      | 2.9E-5         |
| <i>HSPA1B</i>    | 13      | 13                | 6             | rs13215091           | 4.7E-04 | 0                   | 0             | NA                   | NA      | 3.0E-6         |
| <i>NEU1</i>      | 8       | 7                 | 5             | rs9267901            | 9.1E-04 | 1                   | 0             | rs975666             | 0.4341  | 1.1E-4         |
| <i>SLC44A4</i>   | 2       | 2                 | 1             | rs9275141            | 1.1E-06 | 0                   | 0             | NA                   | NA      | 2.0E-5         |
| <i>HLA-DRB6</i>  | 60      | 13                | 6             | rs522254             | 6.3E-04 | 0                   | 0             | NA                   | NA      | 5.8E-5         |
| <i>HLA-DRB1</i>  | 97      | 16                | 7             | rs9272230            | 5.2E-04 | 30                  | 11            | rs3806156            | 0.0001  | 5.0E-6         |
| <i>HLA-DQA1</i>  | 79      | 23                | 5             | rs504594             | 1.7E-05 | 6                   | 4             | rs1235162            | 0.0044  | 8.1E-5         |
| <i>HLA-DQB1</i>  | 78      | 22                | 12            | rs3129719            | 2.6E-06 | 4                   | 3             | rs1063355            | 1.8E-13 | <1E-6          |
| <i>TAP2</i>      | 48      | 36                | 11            | rs2858312            | 1.9E-05 | 0                   | 0             | NA                   | NA      | 3.0E-6         |
| <i>TAP1</i>      | 13      | 11                | 3             | rs6928482            | 2.0E-08 | 1                   | 1             | rs653178             | 0.0363  | <1E-6          |
| Chromosome 15q22 |         |                   |               |                      |         |                     |               |                      |         |                |
| <i>SMAD3</i>     | 7       | 7                 | 2             | rs17293632           | 2.0E-07 | 0                   | 0             | NA                   | NA      | 1.7E-5         |
| Chromosome 16p13 |         |                   |               |                      |         |                     |               |                      |         |                |
| <i>CLEC16A</i>   | 4       | 4                 | 2             | rs35441874           | 2.9E-08 | 0                   | 0             | NA                   | NA      | 2.0E-6         |
| <i>SOCS1</i>     | 7       | 5                 | 5             | rs7184491            | 3.5E-06 | 1                   | 0             | rs1219648            | 0.141   | <1E-6          |
| Chromosome 17q12 |         |                   |               |                      |         |                     |               |                      |         |                |
| <i>CISD3</i>     | 4       | 4                 | 2             | rs2941503            | 1.6E-07 | 0                   | 0             | NA                   | NA      | <1E-6          |
| <i>STARD3</i>    | 7       | 3                 | 1             | rs2941503            | 1.6E-07 | 0                   | 0             | NA                   | NA      | 2.7E-5         |
| <i>PGAP3</i>     | 2       | 2                 | 1             | rs903502             | 1.5E-06 | 0                   | 0             | NA                   | NA      | 1.4E-5         |
| <i>GRB7</i>      | 2       | 1                 | 1             | rs14050              | 1.4E-07 | 0                   | 0             | NA                   | NA      | <1E-6          |
| <i>IKZF3</i>     | 9       | 7                 | 3             | rs7207600            | 4.5E-07 | 0                   | 0             | NA                   | NA      | <1E-6          |
| <i>ZPBP2</i>     | 2       | 2                 | 1             | rs9916765            | 1.9E-09 | 0                   | 0             | NA                   | NA      | <1E-6          |
| <i>GSDMB</i>     | 15      | 11                | 5             | rs2952140            | 1.2E-08 | 0                   | 0             | NA                   | NA      | <1E-6          |
| <i>ORMDL3</i>    | 19      | 12                | 5             | rs2952140            | 1.2E-08 | 2                   | 0             | rs4836703            | 0.4763  | <1E-6          |
| <i>MED24</i>     | 5       | 5                 | 2             | rs7502514            | 4.8E-05 | 0                   | 0             | NA                   | NA      | 1.1E-5         |
| <i>NR1D1</i>     | 5       | 4                 | 2             | rs12150298           | 2.8E-06 | 0                   | 0             | NA                   | NA      | 4.4E-5         |
| <i>TOP2A</i>     | 1       | 1                 | 1             | rs2102928            | 4.1E-05 | 0                   | 0             | NA                   | NA      | 4.6E-5         |

**Table E4.** Individual independent eQTLs contributing to a significant gene-based association test for *TSLP*.

| eQTL       | Study | Tissue      | eQTL effect on gene expression |      |       | eQTL effect on asthma risk |    |      |        | Proxy-eQTL phase | Predicted effect of increased gene expression on asthma risk |
|------------|-------|-------------|--------------------------------|------|-------|----------------------------|----|------|--------|------------------|--------------------------------------------------------------|
|            |       |             | A1                             | Beta | P     | Proxy tested               | A1 | OR   | P      |                  |                                                              |
| rs12110124 | 11    | LCLs        | C                              | -3.3 | 6E-06 | rs12110124                 | T  | 1.08 | 0.0022 | Same             | Increase                                                     |
|            | 9     | Fibroblasts | C                              | -0.2 | 9E-09 |                            |    |      |        |                  |                                                              |
|            | 9     | Spleen      | C                              | -0.8 | 2E-12 |                            |    |      |        |                  |                                                              |
| rs17132582 | 7     | Whole-blood | A                              | 4.0  | 5E-05 | rs17132582                 | A  | 1.16 | 0.0003 | Same             | Increase                                                     |
| rs2289278  | 9     | Fibroblasts | G                              | 0.3  | 5E-06 | rs17132762                 | A  | 0.87 | 0.0028 | AG/GC            | Increase                                                     |
| rs252858   | 7     | Whole-blood | T                              | -3.5 | 4E-04 | rs252858                   | T  | 0.92 | 0.0167 | Same             | Increase                                                     |

**Table E5.** Linkage disequilibrium ( $r^2$ ) between the eQTLs most associated with asthma for each of the 11 genes in the 17q12 region that had a significant association with asthma.

| Gene                            | eQTL       | Asthma <i>P</i> -value | rs12150298 | rs14050 | rs2102928 | rs2941503 | rs2952140 | rs7207600 | rs7502514 | rs903502 | rs9916765 |
|---------------------------------|------------|------------------------|------------|---------|-----------|-----------|-----------|-----------|-----------|----------|-----------|
| <i>NR1D1</i>                    | rs12150298 | 3.E-06                 | 1.00       |         |           |           |           |           |           |          |           |
| <i>GRB7</i>                     | rs14050    | 1.E-07                 | 0.84       | 1.00    |           |           |           |           |           |          |           |
| <i>TOP2A</i>                    | rs2102928  | 4.E-05                 | 0.01       | 0.01    | 1.00      |           |           |           |           |          |           |
| <i>CISD3</i> ,<br><i>STARD3</i> | rs2941503  | 2.E-07                 | 0.85       | 0.99    | 0.01      | 1.00      |           |           |           |          |           |
| <i>GSDMB</i> ,<br><i>ORMDL3</i> | rs2952140  | 1.E-08                 | 0.38       | 0.36    | 0.02      | 0.37      | 1.00      |           |           |          |           |
| <i>IKZF3</i>                    | rs7207600  | 4.E-07                 | 0.08       | 0.08    | 0.18      | 0.09      | 0.21      | 1.00      |           |          |           |
| <i>MED24</i>                    | rs7502514  | 5.E-05                 | 0.01       | 0.02    | 0.10      | 0.02      | 0.05      | 0.22      | 1.00      |          |           |
| <i>PGAP3</i>                    | rs903502   | 1.E-06                 | 0.94       | 0.89    | 0.01      | 0.90      | 0.38      | 0.08      | 0.01      | 1.00     |           |
| <i>ZPBP2</i>                    | rs9916765  | 2.E-09                 | 0.35       | 0.35    | 0.03      | 0.35      | 0.92      | 0.23      | 0.06      | 0.36     | 1.00      |

**Table E6.** Linkage disequilibrium ( $r^2$ ) between the eQTLs most associated with asthma for each of the 13 genes in the MHC region that had a significant association with asthma.

| Gene                | eQTL       | Asthma P-value | rs1063355 | rs13215091 | rs2071595 | rs2442752 | rs2858312 | rs3806156 | rs504594 | rs522254 | rs6928482 | rs9267901 | rs9268764 | rs9275141 | rs9276595 |   |
|---------------------|------------|----------------|-----------|------------|-----------|-----------|-----------|-----------|----------|----------|-----------|-----------|-----------|-----------|-----------|---|
| <i>HLA-DQB1</i>     | rs1063355  | 2.E-13         | 1.00      |            |           |           |           |           |          |          |           |           |           |           |           |   |
| <i>HSPA1B</i>       | rs13215091 | 5.E-04         | 0.00      | 1.00       |           |           |           |           |          |          |           |           |           |           |           |   |
| <i>HCP5</i>         | rs2071595  | 7.E-06         | 0.02      | 0.40       | 1.00      |           |           |           |          |          |           |           |           |           |           |   |
| <i>LTA</i>          | rs2442752  | 2.E-05         | 0.00      | 0.01       | 0.02      | 1.00      |           |           |          |          |           |           |           |           |           |   |
| <i>TAP2</i>         | rs2858312  | 2.E-05         | 0.18      | 0.00       | 0.18      | 0.01      | 1.00      |           |          |          |           |           |           |           |           |   |
| <i>HLA-DRB1</i>     | rs3806156  | 1.E-04         | 0.15      | 0.02       | 0.03      | 0.01      | 0.07      | 1.00      |          |          |           |           |           |           |           |   |
| <i>HLA-DQA1</i>     | rs504594   | 2.E-05         | 0.13      | 0.01       | 0.01      | 0.01      | 0.00      | 0.23      | 1.00     |          |           |           |           |           |           |   |
| <i>HLA-DRB6</i>     | rs522254   | 6.E-04         | 0.05      | 0.01       | 0.01      | 0.00      | 0.00      | 0.26      | 0.58     | 1.00     |           |           |           |           |           |   |
| <i>TAP1</i>         | rs6928482  | 2.E-08         | 0.67      | 0.00       | 0.01      | 0.01      | 0.33      | 0.30      | 0.20     | 0.10     | 1.00      |           |           |           |           |   |
| <i>NEU1</i>         | rs9267901  | 9.E-04         | 0.02      | 0.00       | 0.00      | 0.00      | 0.01      | 0.02      | 0.01     | 0.02     | 0.03      | 1.00      |           |           |           |   |
| <i>MICB</i>         | rs9268764  | 3.E-05         | 0.23      | 0.01       | 0.03      | 0.00      | 0.19      | 0.22      | 0.24     | 0.19     | 0.33      | 0.00      | 1.00      |           |           |   |
| <i>SLC44A4</i>      | rs9275141  | 1.E-06         | 0.54      | 0.00       | 0.01      | 0.02      | 0.41      | 0.31      | 0.17     | 0.08     | 0.86      | 0.03      | 0.27      | 1.00      |           |   |
| <i>HLA-DQB1-AS1</i> | rs9276595  | 4.E-02         | 0.03      | 0.00       | 0.02      | 0.00      | 0.18      | 0.02      | 0.01     | 0.02     | 0.10      | 0.00      | 0.01      | 0.13      | 1.00      | 0 |

**Table E7.** Six genes associated with asthma at an empirical FDR of 0.05 that were not located in established risk loci for asthma but the significant gene-based associations were driven by *trans*-eQTLs located in the MHC region or near *ORMDL3*.

| Gene          | Chr | N eQTLs | <i>cis</i> -eQTLs |               |                      |         | <i>trans</i> -eQTLs |               |                      |         | EUGENE P-value |
|---------------|-----|---------|-------------------|---------------|----------------------|---------|---------------------|---------------|----------------------|---------|----------------|
|               |     |         | N Tested          | N with P<0.05 | Best individual eQTL |         | N Tested            | N with P<0.05 | Best individual eQTL |         |                |
|               |     |         |                   |               | SNP                  | P-value |                     |               | SNP                  | P-value |                |
| <i>LIMS1</i>  | 2   | 15      | 4                 | 0             | rs1522021            | 0.4581  | 10                  | 4             | rs1063355            | 1.8E-13 | <1E-6          |
| <i>AOAH</i>   | 7   | 26      | 17                | 0             | rs2718180            | 0.0509  | 4                   | 3             | rs9268853            | 1.8E-06 | 1.5E-05        |
| <i>ZNF707</i> | 8   | 9       | 7                 | 2             | rs11778657           | 0.0067  | 1                   | 1             | rs17609240           | 1.5E-06 | 4.5E-05        |
| <i>TINF2</i>  | 14  | 4       | 3                 | 1             | rs2273301            | 0.0010  | 1                   | 1             | rs3135006            | 1.7E-06 | <1E-6          |
| <i>CLK3</i>   | 15  | 2       | 1                 | 0             | rs4646421            | 0.5147  | 1                   | 1             | rs9268853            | 1.8E-06 | 1.3E-05        |
| <i>SAFB</i>   | 19  | 2       | 1                 | 0             | rs2184854            | 0.6355  | 1                   | 1             | rs9268853            | 1.8E-06 | 1.0E-05        |

**Table E8.** Individual independent eQTLs contributing to a significant gene-based association test for *LIMS1*, *AOAH*, *ZNF707*, *TINF2*, *CLK3* and *SAFB*.

| eQTL <sup>a</sup> | Study | Tissue        | eQTL effect on gene expression |      |       | eQTL effect on asthma risk |    |      |        | Proxy-eQTL phase | Predicted effect of increased gene expression on asthma risk |
|-------------------|-------|---------------|--------------------------------|------|-------|----------------------------|----|------|--------|------------------|--------------------------------------------------------------|
|                   |       |               | A1                             | Beta | P     | Proxy tested               | A1 | OR   | P      |                  |                                                              |
| <i>LIMS1</i>      |       |               |                                |      |       |                            |    |      |        |                  |                                                              |
| <b>rs13192471</b> | 7     | Whole-blood   | C                              | -8.8 | 1E-18 | rs13192471                 | T  | 1.08 | 0.0147 | Same             | Increase                                                     |
| <b>rs443198</b>   | 7     | Whole-blood   | G                              | 5.5  | 5E-08 | rs443198                   | A  | 0.94 | 0.0076 | Same             | Increase                                                     |
| <b>rs7765379</b>  | 7     | Whole-blood   | G                              | 5.6  | 2E-08 | rs7765379                  | T  | 0.92 | 0.0229 | Same             | Increase                                                     |
| <b>rs9272346</b>  | 7     | Whole-blood   | G                              | -14  | 4E-47 | rs1063355                  | T  | 0.83 | 2E-13  | TG/GA            | Increase                                                     |
| <i>AOAH</i>       |       |               |                                |      |       |                            |    |      |        |                  |                                                              |
| <b>rs674313</b>   | 7     | Whole-blood   | T                              | 6.1  | 1E-09 | rs617058                   | T  | 1.11 | 0.0035 | TT/GC            | Increase                                                     |
| <b>rs9268853</b>  | 17    | Monocytes     | C                              | -6.3 | 4E-09 | rs9268853                  | T  | 0.89 | 2E-06  | Same             | Decrease                                                     |
|                   | 17    | Monocytes-LPS | C                              | -6.2 | 6E-09 | rs9268853                  | T  | 0.89 | 2E-06  | Same             | Decrease                                                     |
|                   | 7     | Whole-blood   | C                              | -14  | 1E-44 | rs9268853                  | T  | 0.89 | 2E-06  | Same             | Decrease                                                     |
|                   | 12    | PBMCs         | T                              | Pos. | 1E-61 | rs9268853                  | T  | 0.89 | 2E-06  | Same             | Decrease                                                     |
| <b>rs9357155</b>  | 7     | Whole-blood   | A                              | -4.6 | 4E-06 | rs9357155                  | A  | 0.91 | 0.0047 | Same             | Increase                                                     |
| <i>TINF2</i>      |       |               |                                |      |       |                            |    |      |        |                  |                                                              |
| <u>rs2273301</u>  | 7     | Whole-blood   | A                              | 3.1  | 2E-03 | rs2273301                  | A  | 0.85 | 0.0010 | Same             | Decrease                                                     |
| <b>rs3135006</b>  | 17    | Monocytes     | T                              | -8.1 | 5E-13 | rs3135006                  | T  | 0.88 | 2E-06  | Same             | Increase                                                     |
|                   | 17    | Monocytes-LPS | T                              | -9.4 | 3E-16 | rs3135006                  | T  | 0.88 | 2E-06  | Same             | Increase                                                     |
| <i>ZNF707</i>     |       |               |                                |      |       |                            |    |      |        |                  |                                                              |
| <u>rs10097337</u> | 7     | Whole-blood   | A                              | 5.4  | 5E-08 | rs10097337                 | A  | 0.95 | 0.0353 | Same             | Decrease                                                     |
| <u>rs11778657</u> | 7     | Whole-blood   | G                              | 5.3  | 1E-07 | rs11778657                 | A  | 0.93 | 0.0067 | Same             | Increase                                                     |
| <u>rs17609240</u> | 7     | Whole-blood   | T                              | -4.6 | 4E-06 | rs17609240                 | T  | 0.90 | 1E-06  | Same             | Increase                                                     |
| <i>CLK3</i>       |       |               |                                |      |       |                            |    |      |        |                  |                                                              |
| <b>rs9268853</b>  | 12    | PBMCs         | T                              | Pos. | 7E-17 | rs9268853                  | T  | 0.89 | 2E-06  | Same             | Decrease                                                     |
| <i>SAFB</i>       |       |               |                                |      |       |                            |    |      |        |                  |                                                              |
| <b>rs9268853</b>  | 7     | Whole-blood   | C                              | 4.7  | 3E-06 | rs9268853                  | T  | 0.89 | 2E-06  | Same             | Increase                                                     |

<sup>a</sup>In bold: *trans*-eQTLs located in the MHC region. Underlined: *cis*-eQTLs. Italic: *trans*-eQTL located near ORMDL3. Pos.: positive beta.

**Table E9.** Association results in the Moffatt et al. <sup>22</sup> GWAS for the eleven genes that represent a potential novel genetic association with asthma.

| Gene           | Position     | N eQTLs tested | N eQTLs with $P < 0.05$ | Best individual eQTL |            | EUGENE $P$ -value |
|----------------|--------------|----------------|-------------------------|----------------------|------------|-------------------|
|                |              |                |                         | SNP                  | $P$ -value |                   |
| <i>B4GALT3</i> | 1:161141100  | 7              | 2                       | rs11587213           | 0.0102     | 0.0175            |
| <i>P2RY14</i>  | 3:150929905  | 9              | 1                       | rs2870518            | 0.0172     | 0.0412            |
| <i>P2RY13</i>  | 3:151044100  | 8              | 1                       | rs2870518            | 0.0172     | 0.0484            |
| <i>P2RY12</i>  | 3:151055168  | 6              | 0                       | rs3732765            | 0.0598     | 0.1165            |
| <i>F12</i>     | 5:176829141  | 3              | 0                       | rs2731672            | 0.4332     | 0.8810            |
| <i>HIBADH</i>  | 7:27565061   | 11             | 1                       | rs16874305           | 0.0442     | 0.4670            |
| <i>REEP3</i>   | 10:65281123  | 1              | 0                       | rs7915849            | 0.6660     | 0.6640            |
| <i>USMG5</i>   | 10:105148798 | 11             | 3                       | rs7897947            | 0.0004     | 0.0014            |
| <i>PTCSC3</i>  | 14:36605314  | 1              | 0                       | rs1766142            | 0.9076     | 0.9052            |
| <i>DYNC1H1</i> | 14:102430865 | 3              | 0                       | rs12590618           | 0.6588     | 0.9530            |
| <i>ACO2</i>    | 22:41865129  | 2              | 0                       | rs132902             | 0.1161     | 0.1583            |



**Table E10.** Direction of effect on asthma risk for asthma-associated eQTLs in *P2RY13*, *P2RY14*, *USMG5* and *B4GALT3*, in two independent GWAS.

| eQTL                   | eQTL effect in Ferreira et al 2014 |    |      |          | eQTL effect in Moffatt et al 2010 |    |      |          | LD between Ferreira and Moffatt proxies |          | Consistency in direction of effect |
|------------------------|------------------------------------|----|------|----------|-----------------------------------|----|------|----------|-----------------------------------------|----------|------------------------------------|
|                        | Proxy tested                       | A1 | OR   | <i>P</i> | Proxy tested                      | A1 | OR   | <i>P</i> | <i>r</i> <sup>2</sup>                   | Phase    |                                    |
| <i>P2RY13</i>          |                                    |    |      |          |                                   |    |      |          |                                         |          |                                    |
| rs2870518              | rs2870518                          | T  | 0.95 | 0.0364   | rs2870518                         | T  | 0.95 | 0.0172   | 1.00                                    | Same SNP | Same                               |
| rs6440732 <sup>a</sup> | rs6440732                          | A  | 0.93 | 0.0102   | rs1466684                         | G  | 1.02 | 0.4071   | 1.00                                    | CG/AA    | Same                               |
| rs6440742              | rs6440742                          | T  | 0.94 | 0.0199   | rs6781302                         | G  | 0.99 | 0.6044   | 0.95                                    | GG/TA    | Opposite                           |
| rs9814936              | rs9814936                          | A  | 1.12 | 0.0001   | rs9848789                         | T  | 0.96 | 0.1189   | 1.00                                    | GT/AC    | Same                               |
| rs9877416              | rs9877416                          | A  | 0.90 | 0.0001   | rs9877416                         | G  | 1.05 | 0.0770   | 1.00                                    | Same SNP | Same                               |
| <i>P2RY14</i>          |                                    |    |      |          |                                   |    |      |          |                                         |          |                                    |
| rs10513393             | rs10513393                         | A  | 0.89 | 0.0001   | rs9848789                         | T  | 0.96 | 0.1189   | 1.00                                    | AT/GC    | Same                               |
| rs17204536             | rs2276765                          | A  | 0.94 | 0.0125   | rs3732765                         | G  | 0.96 | 0.0598   | 0.98                                    | GA/AG    | Same                               |
| rs2870518              | rs2870518                          | T  | 0.95 | 0.0364   | rs2870518                         | T  | 0.95 | 0.0172   | 1.00                                    | Same SNP | Same                               |
| rs7616382              | rs7616382                          | A  | 0.93 | 0.0271   | rs1907637                         | G  | 0.98 | 0.3918   | 1.00                                    | TA/AG    | Same                               |
| rs9843590              | rs9843590                          | A  | 1.08 | 0.0040   | NA                                | NA | NA   | NA       | NA                                      | NA       | NA                                 |
| <i>USMG5</i>           |                                    |    |      |          |                                   |    |      |          |                                         |          |                                    |
| rs11191724             | rs11191724                         | A  | 0.95 | 0.0495   | NA                                | NA | NA   | NA       | NA                                      | NA       | NA                                 |
| rs1163073              | rs1163073                          | T  | 0.92 | 0.0005   | rs1163073                         | T  | 0.97 | 0.2240   | 1.00                                    | Same SNP | Same                               |
| rs1572530              | rs1572530                          | A  | 1.05 | 0.0644   | rs7897947                         | T  | 0.91 | 0.0004   | 0.82                                    | AG/GT    | Same                               |
| rs17784294             | rs17784294                         | A  | 0.95 | 0.0693   | rs7904252                         | T  | 0.93 | 0.0020   | 0.97                                    | AT/CG    | Same                               |
| rs2250580              | rs2250580                          | C  | 1.05 | 0.0734   | rs2486757                         | T  | 1.06 | 0.0135   | 0.99                                    | CT/GC    | Same                               |
| rs2271750              | rs2271750                          | A  | 0.91 | 0.0048   | rs2271750                         | G  | 1.02 | 0.4629   | 1.00                                    | Same SNP | Same                               |
| rs999867               | rs999867                           | T  | 1.10 | 0.0211   | rs999867                          | T  | 1.04 | 0.2720   | 1.00                                    | Same SNP | Same                               |
| <i>B4GALT3</i>         |                                    |    |      |          |                                   |    |      |          |                                         |          |                                    |
| rs11579627             | rs11579627                         | A  | 1.07 | 0.0124   | rs11581556                        | G  | 1.04 | 0.1137   | 0.89                                    | AA/GG    | Opposite                           |
| rs11587213             | rs11587213                         | A  | 1.04 | 0.1997   | rs11587213                        | G  | 0.93 | 0.0102   | 1.00                                    | Same SNP | Same                               |
| rs4233366              | rs4233366                          | T  | 1.08 | 0.0033   | rs4233366                         | T  | 1.05 | 0.0236   | 1.00                                    | Same SNP | Same                               |
| rs1668873 <sup>b</sup> | rs1668873                          | A  | 0.93 | 0.0015   | rs7531256                         | T  | 1.02 | 0.3060   | 0.91                                    | AG/GT    | Same                               |

<sup>a</sup>rs6440732 is in LD ( $r^2=0.94$ ) with a missense SNP (rs1466684; T158M) in *P2RY13*.

<sup>b</sup>rs1668873 is a *trans*-eQTL; all others are *cis*-eQTLs.

**Table E11.** Direction of effect on gene expression and disease risk for asthma-associated eQTLs in *P2RY13*, *P2RY14*, *USMG5* and *B4GALT3*.

| eQTL <sup>a</sup> | Study | Tissue      | eQTL effect on gene expression |      |        | eQTL effect on asthma risk |    |      |        | Proxy - eQTL phase | Predicted effect of increased gene expression on asthma risk |
|-------------------|-------|-------------|--------------------------------|------|--------|----------------------------|----|------|--------|--------------------|--------------------------------------------------------------|
|                   |       |             | A1                             | Beta | P      | Proxy tested               | A1 | OR   | P      |                    |                                                              |
| <i>P2RY13</i>     |       |             |                                |      |        |                            |    |      |        |                    |                                                              |
| rs2870518         | 7     | Whole-blood | C                              | 4.7  | 2E-06  | rs2870518                  | T  | 0.95 | 0.0364 | Same               | Increase                                                     |
| rs6440732         | 7     | Whole-blood | C                              | 24   | 2E-125 | rs6440732                  | A  | 0.93 | 0.0102 | Same               | Increase                                                     |
| rs6440742         | 7     | Whole-blood | G                              | 10   | 2E-25  | rs6440742                  | T  | 0.94 | 0.0199 | Same               | Increase                                                     |
| rs9814936         | 7     | Whole-blood | G                              | -8.5 | 3E-17  | rs9814936                  | A  | 1.12 | 0.0001 | Same               | Increase                                                     |
| rs9877416         | 7     | Whole-blood | G                              | 5.6  | 2E-08  | rs9877416                  | A  | 0.90 | 0.0001 | Same               | Increase                                                     |
| <i>P2RY14</i>     |       |             |                                |      |        |                            |    |      |        |                    |                                                              |
| rs10513393        | 6     | Whole-blood | NA                             | NA   | 4E-56  | rs10513393                 | A  | 0.89 | 0.0001 | Same               | Increase                                                     |
|                   | 7     | Whole-blood | A                              | -14  | 2E-42  |                            |    |      |        | Same               | Increase                                                     |
| rs17204536        | 7     | Whole-blood | T                              | 5.7  | 1E-08  | rs2276765                  | A  | 0.94 | 0.0125 | GT/A<br>C          | Increase                                                     |
| rs2870518         | 7     | Whole-blood | C                              | 5    | 5E-07  | rs2870518                  | T  | 0.95 | 0.0364 | Same               | Increase                                                     |
| rs7616382         | 7     | Whole-blood | T                              | 3.4  | 8E-04  | rs7616382                  | A  | 0.93 | 0.0271 | Same               | Increase                                                     |
| rs9843590         | 7     | Whole-blood | A                              | 3.7  | 3E-04  | rs9843590                  | A  | 1.08 | 0.0040 | Same               | Increase                                                     |
| <i>USMG5</i>      |       |             |                                |      |        |                            |    |      |        |                    |                                                              |
| rs11191724        | 7     | Whole-blood | A                              | 8.8  | 1E-18  | rs11191724                 | A  | 0.95 | 0.0495 | Same               | Decrease                                                     |
| rs1163073         | 18    | Neutrophils | C                              | Pos. | 5E-25  | rs1163073                  | T  | 0.92 | 0.0005 | Same               | Increase                                                     |
|                   | 11    | LCLs        | C                              | 73   | 4E-119 |                            |    |      |        | Same               | Increase                                                     |
|                   | 15    | LCLs        | T                              | -1.2 | 4E-116 |                            |    |      |        | Same               | Increase                                                     |
|                   | 15    | Skin        | T                              | -0.6 | 3E-90  |                            |    |      |        | Same               | Increase                                                     |
|                   | 7     | Whole-blood | C                              | 64   | 1E-197 |                            |    |      |        | Same               | Increase                                                     |
|                   | 12    | PBMCs       | C                              | Pos. | 0E+00  |                            |    |      |        | Same               | Increase                                                     |
| rs1572530         | 12    | PBMCs       | G                              | Neg. | 2E-15  | rs1572530                  | A  | 1.05 | 0.0644 | Same               | Increase                                                     |
| rs17784294        | 11    | LCLs        | A                              | -19  | 2E-06  | rs17784294                 | A  | 0.95 | 0.0693 | Same               | Increase                                                     |
|                   | 12    | PBMCs       | C                              | Pos. | 3E-14  |                            |    |      |        | Same               | Increase                                                     |
| rs2250580         | 12    | PBMCs       | C                              | Pos. | 2E-12  | rs2250580                  | C  | 1.05 | 0.0734 | Same               | Increase                                                     |
| rs2271750         | 11    | LCLs        | A                              | -30  | 2E-06  | rs2271750                  | A  | 0.91 | 0.0048 | Same               | Increase                                                     |
|                   | 7     | Whole-blood | A                              | -15  | 1E-48  |                            |    |      |        | Same               | Increase                                                     |
|                   | 12    | PBMCs       | G                              | Pos. | 2E-13  |                            |    |      |        | Same               | Increase                                                     |
| rs999867          | 15    | LCLs        | T                              | 0.6  | 3E-13  | rs999867                   | T  | 1.10 | 0.0211 | Same               | Increase                                                     |
|                   | 15    | Skin        | T                              | 0.3  | 1E-10  |                            |    |      |        | Same               | Increase                                                     |
|                   | 12    | PBMCs       | T                              | Pos. | 5E-24  |                            |    |      |        | Same               | Increase                                                     |
| <i>B4GALT3</i>    |       |             |                                |      |        |                            |    |      |        |                    |                                                              |
| rs11579627        | 13    | Neutrophils | A                              | -0.1 | 3E-05  | rs11579627                 | A  | 1.07 | 0.0124 | Same               | Decrease                                                     |
| rs11587213        | 9     | Fibroblasts | G                              | Neg. | 1E-07  | rs11587213                 | A  | 1.04 | 0.1997 | Same               | Increase                                                     |
|                   | 7     | Whole-blood | G                              | -4.8 | 2E-06  |                            |    |      |        | Same               | Increase                                                     |
| rs4233366         | 9     | Fibroblasts | T                              | Pos. | 2E-26  | rs4233366                  | T  | 1.08 | 0.0033 | Same               | Increase                                                     |
| <b>rs1668873</b>  | 7     | Whole-blood | A                              | 5    | 6E-07  | rs1668873                  | A  | 0.93 | 0.0015 | Same               | Decrease                                                     |

<sup>a</sup>In bold: *trans*-eQTL. Pos.: positive beta. Neg.: negative beta.

**Table E12.** Primers used in gene expression analyses of RNA extracted from mouse lung.

| Gene          | Oligonucleotide Primer                                                                |
|---------------|---------------------------------------------------------------------------------------|
| <i>P2ry13</i> | Forward: 5' - GTGGGTTGAGCTAGTAACTGCC-3'<br>Reverse: 5' - CATCCCAGTGGTGTGATTG-3'       |
| <i>P2ry14</i> | Forward: 5' - TCCTCCAGACACACTGATGC-3'<br>Reverse: 5' - AAAGGCAAGCTTCGTCAACA-3'        |
| <i>Hprt</i>   | Forward: 5' - AGGCCAGACTTTGTTGGATTGAA-3'<br>Reverse: 5' - CAACTTGCGCTCATCTTAGGCTTT-3' |

## **E FIGURE LEGENDS**

**Figure E1.** Number of independent eQTLs per gene identified from published GWAS of gene expression.

**Figure E2.** Expression of P2ry13 and P2ry14 in lymphocytes (**A**), monocytes (**B**), conventional dendritic cells (**C**) and plasmacytoid dendritic cells (**D**) collected in BALF after saline or HDM challenge.

**Figure E3. In vivo exposure to P2ry13 and P2ry14 receptor agonists in naïve C57Bl/6 mice.** Total number of monocytes (**A**), neutrophils (**B**) and conventional dendritic cells (**C**) recruited to the BALF based on flow cytometry analysis. Veh: vehicle. HDM: house dust mite allergen. CRE: cockroach allergen. Alt: alternaria allergen.

### **Collaborators of the Australian Asthma Genetics Consortium (AAGC)**

David L. Duffy<sup>a</sup>, Dale R. Nyholt<sup>a</sup>, John Beilby<sup>b-d</sup>, Loren Price<sup>e</sup>, Faang Cheah<sup>e</sup>, Desiree Mészáros<sup>f</sup>, Scott D. Gordon<sup>a</sup>, Melissa C. Southey<sup>g</sup>, Margaret J. Wright<sup>a</sup>, James Markos<sup>h</sup>, Li P. Chung<sup>e</sup>, Anjali K. Henders<sup>a</sup>, Graham Giles<sup>i</sup>, Suzanna Temple<sup>e</sup>, John Whitfield<sup>a</sup>, Brad Shelton<sup>e</sup>, Chalermchai Mitrpant<sup>e</sup>, Minh Bui, PhD,<sup>j</sup> Mark Jenkins<sup>j</sup>, Haydn Walters<sup>f</sup>, Michael J. Abramson<sup>k</sup>, Michael Hunter<sup>l,d</sup>, Bill Musk<sup>l,d,m,n</sup>, Matthew A Brown<sup>o</sup>, Shyamali C. Dharmage<sup>j</sup>

<sup>a</sup> QIMR Berghofer Medical Research, Brisbane, Australia.

<sup>b</sup> PathWest Laboratory Medicine of Western Australia (WA), Nedlands, Australia.

<sup>c</sup> School of Pathology and Laboratory Medicine, The University of WA, Nedlands, Australia.

<sup>d</sup> Busselton Population Medical Research Foundation, Sir Charles Gairdner Hospital, Perth, Australia.

<sup>e</sup> Lung Institute of WA and Centre for Asthma, Allergy and Respiratory Research, University of WA, Perth, Australia.

<sup>f</sup> Menzies Research Institute, Hobart, Australia.

<sup>g</sup> Department of Pathology, The University of Melbourne, Melbourne, Australia.

<sup>h</sup> Launceston General Hospital, Launceston, Australia.

<sup>i</sup> Cancer Epidemiology Centre, The Cancer Council Victoria, Melbourne, Australia.

<sup>j</sup> Centre for Molecular, Environmental, Genetic and Analytic Epidemiology, University of Melbourne, Melbourne, Australia.

<sup>k</sup> Department of Epidemiology & Preventive Medicine, Monash University, Melbourne, Australia

<sup>l</sup> School of Population Health, The University of WA, Nedlands, Australia

<sup>m</sup> School of Medicine and Pharmacology, University of Western Australia, Nedlands, Australia

<sup>n</sup> Department of Respiratory Medicine, Sir Charles Gairdner Hospital, Perth, Australia

<sup>o</sup> The University of Queensland Diamantina Institute, Translational Research Institute, Australia

## SUPPLEMENTAL REFERENCES

1. Purcell S, Neale B, Todd-Brown K, Thomas L, Ferreira MA, Bender D, et al. PLINK: a tool set for whole-genome association and population-based linkage analyses. *Am J Hum Genet* 2007; 81:559-75.
2. Genomes Project C, Abecasis GR, Auton A, Brooks LD, DePristo MA, Durbin RM, et al. An integrated map of genetic variation from 1,092 human genomes. *Nature* 2012; 491:56-65.
3. Storey JD, Tibshirani R. Statistical significance for genomewide studies. *Proc Natl Acad Sci U S A* 2003; 100:9440-5.
4. Ullah MA, Revez JA, Loh Z, Simpson J, Zhang V, Bain L, et al. Allergen-induced IL-6 trans-signaling activates gammadelta T cells to promote type 2 and type 17 airway inflammation. *J Allergy Clin Immunol* 2015; 136:1065-73.
5. Davidson S, Kaiko G, Loh Z, Lalwani A, Zhang V, Spann K, et al. Plasmacytoid dendritic cells promote host defense against acute pneumovirus infection via the TLR7-MyD88-dependent signaling pathway. *J Immunol* 2011; 186:5938-48.
6. arc OC, arc OC, Zeggini E, Panoutsopoulou K, Southam L, Rayner NW, et al. Identification of new susceptibility loci for osteoarthritis (arcOGEN): a genome-wide association study. *Lancet* 2012; 380:815-23.
7. Westra HJ, Peters MJ, Esko T, Yaghootkar H, Schurmann C, Kettunen J, et al. Systematic identification of trans eQTLs as putative drivers of known disease associations. *Nat Genet* 2013; 45:1238-43.
8. Hao K, Bosse Y, Nickle DC, Pare PD, Postma DS, Laviolette M, et al. Lung eQTLs to help reveal the molecular underpinnings of asthma. *PLoS Genet* 2012; 8:e1003029.
9. Consortium GT. Human genomics. The Genotype-Tissue Expression (GTEx) pilot analysis: multitissue gene regulation in humans. *Science* 2015; 348:648-60.
10. Fairfax BP, Makino S, Radhakrishnan J, Plant K, Leslie S, Dilthey A, et al. Genetics of gene expression in primary immune cells identifies cell type-specific master regulators and roles of HLA alleles. *Nat Genet* 2012; 44:502-10.
11. Lappalainen T, Sammeth M, Friedlander MR, Hoen PA, Monlong J, Rivas MA, et al. Transcriptome and genome sequencing uncovers functional variation in humans. *Nature* 2013; 501:506-11.
12. Zeller T, Wild P, Szymczak S, Rotival M, Schillert A, Castagne R, et al. Genetics and beyond--the transcriptome of human monocytes and disease susceptibility. *PLoS One* 2010; 5:e10693.
13. Naranbhai V, Fairfax BP, Makino S, Humburg P, Wong D, Ng E, et al. Genomic modulators of gene expression in human neutrophils. *Nat Commun* 2015; 6:7545.
14. Birney E, Stamatoyannopoulos JA, Dutta A, Guigo R, Gingeras TR, Margulies EH, et al. Identification and analysis of functional elements in 1% of the human genome by the ENCODE pilot project. *Nature* 2007; 447:799-816.
15. Lango Allen H, Estrada K, Lettre G, Berndt SI, Weedon MN, Rivadeneira F, et al. Hundreds of variants clustered in genomic loci and biological pathways affect human height. *Nature*; 467:832-8.
16. Dixon AL, Liang L, Moffatt MF, Chen W, Heath S, Wong KC, et al. A genome-wide association study of global gene expression. *Nat Genet* 2007; 39:1202-7.
17. Kim S, Becker J, Bechheim M, Kaiser V, Noursadeghi M, Fricker N, et al. Characterizing the genetic basis of innate immune response in TLR4-activated human monocytes. *Nat Commun*

2014; 5:5236.

18. Andiappan AK, Melchiotti R, Poh TY, Nah M, Puan KJ, Vigano E, et al. Genome-wide analysis of the genetic regulation of gene expression in human neutrophils. *Nat Commun* 2015; 6:7971.
19. Ding J, Gudjonsson JE, Liang L, Stuart PE, Li Y, Chen W, et al. Gene expression in skin and lymphoblastoid cells: Refined statistical method reveals extensive overlap in cis-eQTL signals. *Am J Hum Genet* 2010; 87:779-89.
20. Luo W, Obeidat M, Di Narzo AF, Chen R, Sin DD, Pare PD, et al. Airway Epithelial Expression Quantitative Trait Loci Reveal Genes Underlying Asthma and Other Airway Diseases. *Am J Respir Cell Mol Biol* 2016; 54:177-87.
21. Brumpton BM, Ferreira MA. Multivariate eQTL mapping uncovers functional variation on the X-chromosome associated with complex disease traits. *Hum Genet* 2016.
22. Moffatt MF, Gut IG, Demenais F, Strachan DP, Bouzigon E, Heath S, et al. A large-scale, consortium-based genomewide association study of asthma. *N Engl J Med* 2010; 363:1211-21.

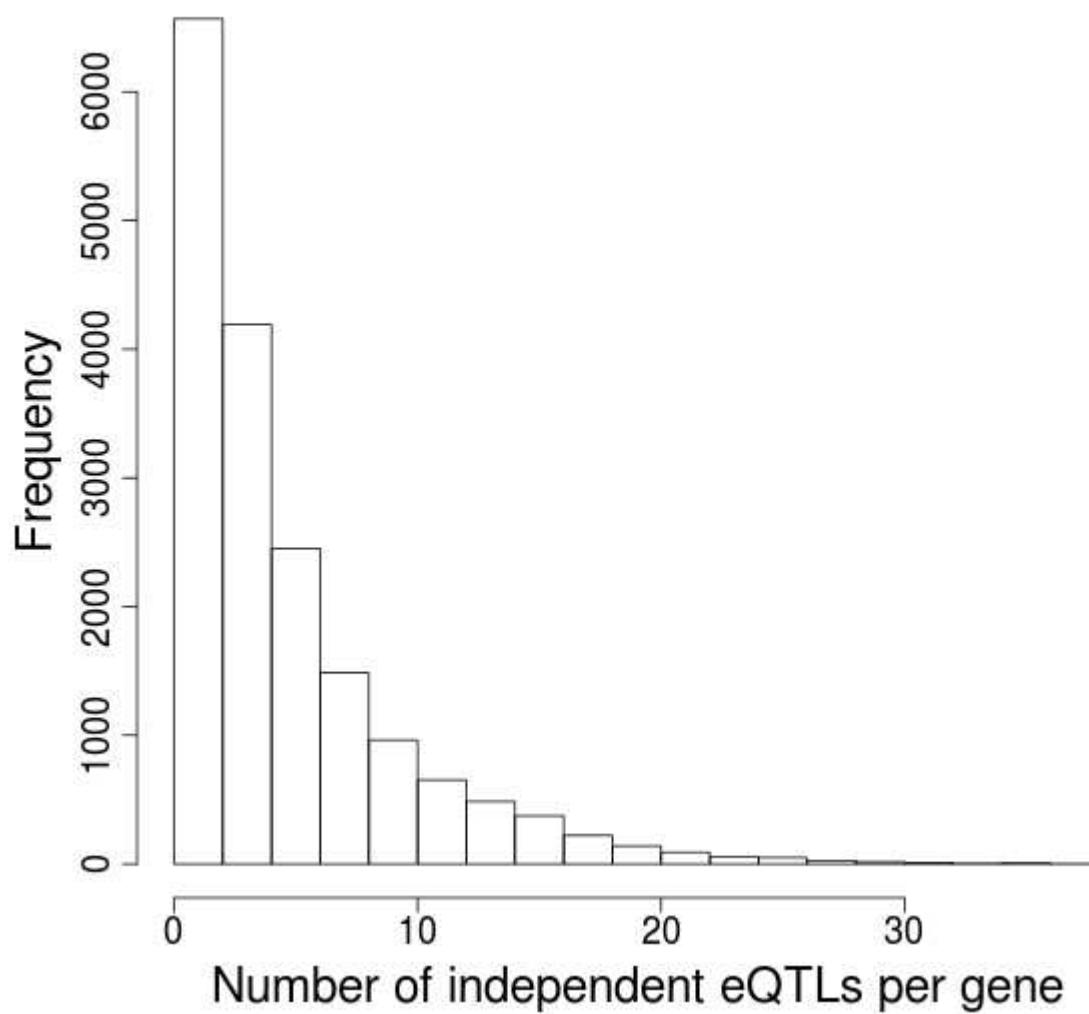



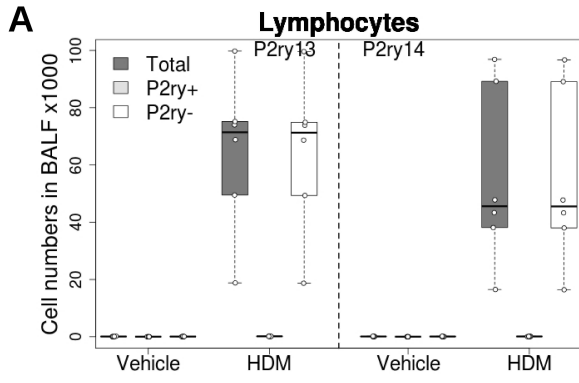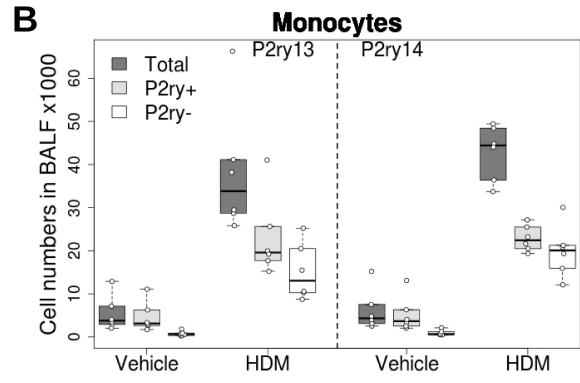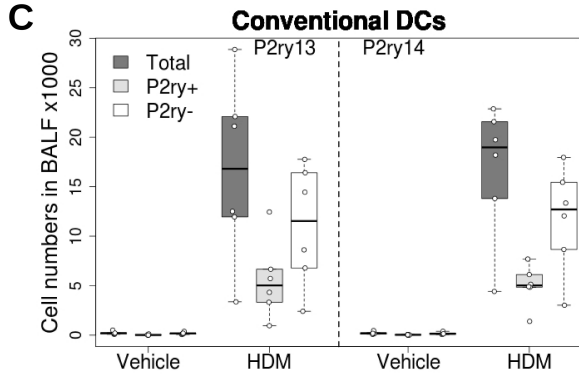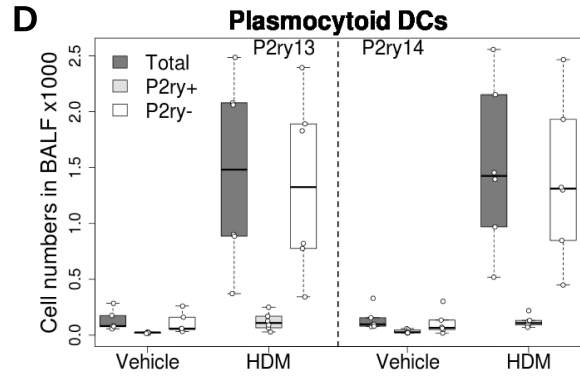

**A**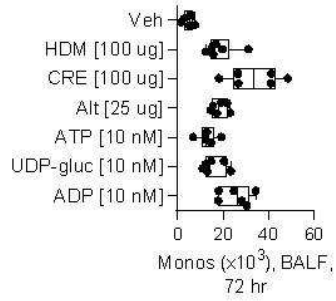**B**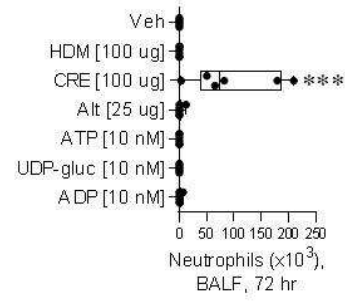**C**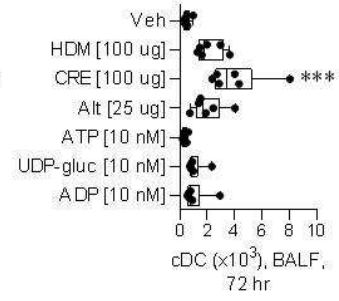

Supplement: NIHMS811788-supplement-supplement_1.pdf [file NIHMS811788-supplement-supplement_1.pdf]
